# Supplementary material for: Provision of digital health interventions for young people with ADHD in primary care: findings from a national survey and scoping review
Source: Research Square preprint supplement (doi:10.21203/rs.3.rs-3526525/v1), 2023-11-07

## Additional file 1: Scoping review additional methods

A: Scoping review search strategy

Date all searches run: 9 December 2022

| Database | Search terms                                                                                                                                                                                                                                                                                                                                                                                                                                                                                                                                                                                                                                                                                                                                                                                                                                                                                                                                                                                                                                                                                                                                                                                                                                                                                                                                                                                                                                                                                                                                                                                                                                                                                                                                                                                                                                                                                                                                                                                                                                                                                                                                                                                                                                                                                                                                                                                         |
|----------|------------------------------------------------------------------------------------------------------------------------------------------------------------------------------------------------------------------------------------------------------------------------------------------------------------------------------------------------------------------------------------------------------------------------------------------------------------------------------------------------------------------------------------------------------------------------------------------------------------------------------------------------------------------------------------------------------------------------------------------------------------------------------------------------------------------------------------------------------------------------------------------------------------------------------------------------------------------------------------------------------------------------------------------------------------------------------------------------------------------------------------------------------------------------------------------------------------------------------------------------------------------------------------------------------------------------------------------------------------------------------------------------------------------------------------------------------------------------------------------------------------------------------------------------------------------------------------------------------------------------------------------------------------------------------------------------------------------------------------------------------------------------------------------------------------------------------------------------------------------------------------------------------------------------------------------------------------------------------------------------------------------------------------------------------------------------------------------------------------------------------------------------------------------------------------------------------------------------------------------------------------------------------------------------------------------------------------------------------------------------------------------------------|
| Medline  | <p>1 "Attention Deficit and Disruptive Behavior Disorders"/ or Attention Deficit Disorder with Hyperactivity/<br/> 2 ((attenti* or disrupt*) adj3 (adolescent* or adult* or behav* or child* or class or classes or classroom* or condition* or difficult* or disorder* or learn* or people or person* or poor or problem* or process* or youngster*)),ti.<br/> 3 ((attenti* or disrupt*) adj3 disorder*).ab.<br/> 4 (adhd or addh or ad hd or ad??hd).ti,ab.<br/> 5 (attenti* adj3 deficit*).ti,ab.<br/> 6 (((hyperkin* or hyper kin*) adj1 (syndrome* or disorder*)) or hkd).ti,ab.<br/> 7 (minimal brain adj2 (dysfunct* or disorder*)),ti,ab.<br/> 8 1 or 2 or 3 or 4 or 5 or 6 or 7<br/> 9 Adolescent/ or Adolescent Health Services/<br/> 10 Child/ or Child Health Services/<br/> 11 Young Adult/<br/> 12 (child* or adolescent* or teenager* or young adult or young person).ti,ab.<br/> 13 9 or 10 or 11 or 12<br/> 14 Mobile Applications/<br/> 15 exp Internet/<br/> 16 Therapy, Computer-Assisted/<br/> 17 (app or apps or application).ti,ab.<br/> 18 (online or web or internet or digital*).ti.<br/> 19 ((online or web or internet or digital*) adj3 (based or application* or intervention* or program* or therap*)),ab.<br/> 20 (phone* or telephone* or smartphone* or cellphone* or smartwatch*).ti.<br/> 21 ((phone* or telephone* or smartphone* or cellphone* or smartwatch*) adj3 (based or application* or intervention* or program* or therap*)),ab.<br/> 22 (mobile health or mhealth or m-health or ehealth or e-health or emental or e-mental).ti.<br/> 23 ((mobile health or mhealth or m-health or ehealth or e-health or emental or e-mental) adj3 (based or application* or intervention* or program* or therap*)),ab.<br/> 24 (mobile* adj3 (based or application* or intervention* or device* or technolog*)),ti,ab.<br/> 25 ((digital or online or internet or web*) adj4 (information or resource* or source* or toolkit* or tool-kit* or interactive*)),ab.<br/> 26 ((video* or multimedia or audiovisual* or youtube) adj4 (information or resource*)),ti,ab.<br/> 27 Consumer Health Information/<br/> 28 Social Media/<br/> 29 internet/ or internet-based intervention/<br/> 30 14 or 15 or 16 or 17 or 18 or 19 or 20 or 21 or 22 or 23 or 24 or 25 or 26 or 27 or 28 or 29<br/> 31 8 and 13 and 30<br/> 32 limit 31 to (english language and humans)</p> |
| Embase   | <p>1 attention deficit hyperactivity disorder/</p>                                                                                                                                                                                                                                                                                                                                                                                                                                                                                                                                                                                                                                                                                                                                                                                                                                                                                                                                                                                                                                                                                                                                                                                                                                                                                                                                                                                                                                                                                                                                                                                                                                                                                                                                                                                                                                                                                                                                                                                                                                                                                                                                                                                                                                                                                                                                                   |

|                  |                                                                                                                                                                                                                                                                                                                                                                                                                                                                                                                                                                                                                                                                                                                                                                                                                                                                                                                                                                                                                                                                                                                                                                                                                                                                                                                                                                                                                                                                                                                                                                                                                                                                                                                                                                                                                                                                                                                                                                                                                                                                                                                                                                                                                                                                                                                                         |
|------------------|-----------------------------------------------------------------------------------------------------------------------------------------------------------------------------------------------------------------------------------------------------------------------------------------------------------------------------------------------------------------------------------------------------------------------------------------------------------------------------------------------------------------------------------------------------------------------------------------------------------------------------------------------------------------------------------------------------------------------------------------------------------------------------------------------------------------------------------------------------------------------------------------------------------------------------------------------------------------------------------------------------------------------------------------------------------------------------------------------------------------------------------------------------------------------------------------------------------------------------------------------------------------------------------------------------------------------------------------------------------------------------------------------------------------------------------------------------------------------------------------------------------------------------------------------------------------------------------------------------------------------------------------------------------------------------------------------------------------------------------------------------------------------------------------------------------------------------------------------------------------------------------------------------------------------------------------------------------------------------------------------------------------------------------------------------------------------------------------------------------------------------------------------------------------------------------------------------------------------------------------------------------------------------------------------------------------------------------------|
|                  | <p>2 ((attenti* or disrupt*) adj3 (adolescent* or adult* or behav* or child* or class or classes or classroom* or condition* or difficult* or disorder* or learn* or people or person* or poor or problem* or process* or youngster*).ti.</p> <p>3 ((attenti* or disrupt*) adj3 disorder*).ab.</p> <p>4 (adhd or addh or ad hd or ad??hd).ti,ab.</p> <p>5 (attenti* adj3 deficit*).ti,ab.</p> <p>6 (((hyperkin* or hyper kin*) adj1 (syndrome* or disorder*)) or hkd).ti,ab.</p> <p>7 (minimal brain adj2 (dysfunct* or disorder*).ti,ab.</p> <p>8 1 or 2 or 3 or 4 or 5 or 6 or 7</p> <p>9 adolescent/</p> <p>10 child/</p> <p>11 young adult/</p> <p>12 (child* or adolescent* or teenager* or young adult or young person).ti,ab.</p> <p>13 9 or 10 or 11 or 12</p> <p>14 exp mobile application/</p> <p>15 exp internet/</p> <p>16 computer assisted therapy/</p> <p>17 (app or apps or application).ti,ab.</p> <p>18 (online or web or internet or digital*).ti.</p> <p>19 ((online or web or internet or digital*) adj3 (based or application* or intervention* or program* or therap*).ab. 98623</p> <p>20 (phone* or telephone* or smartphone* or cellphone* or smartwatch*).ti.</p> <p>21 ((phone* or telephone* or smartphone* or cellphone* or smartwatch*) adj3 (based or application* or intervention* or program* or therap*).ab.</p> <p>22 (mobile health or mhealth or m-health or ehealth or e-health or emental or e-mental).ti.</p> <p>23 ((mobile health or mhealth or m-health or ehealth or e-health or emental or e-mental) adj3 (based or application* or intervention* or program* or therap*).ab.</p> <p>24 (mobile* adj3 (based or application* or intervention* or device* or technolog*).ti,ab.</p> <p>25 consumer health information/</p> <p>26 audiovisual aid/</p> <p>27 social media/</p> <p>28 internet/ or web-based intervention/</p> <p>29 ((digital or online or internet or web*) adj4 (information or resource* or source* or toolkit* or tool-kit* or interactive*).ab.</p> <p>30 ((video* or multimedia or audiovisual* or youtube) adj4 (information or resource* or story or stories)).ti,ab.</p> <p>31 14 or 15 or 16 or 17 or 18 or 19 or 20 or 21 or 22 or 23 or 24 or 25 or 26 or 27 or 28 or 29 or 30</p> <p>32 8 and 13 and 31</p> <p>33 limit 32 to (human and English language)</p> |
| Cochrane Library | <p>1 MeSH descriptor: [Attention Deficit and Disruptive Behavior Disorders] this term only</p> <p>2 MeSH descriptor: [Attention Deficit Disorder with Hyperactivity] explode all trees</p>                                                                                                                                                                                                                                                                                                                                                                                                                                                                                                                                                                                                                                                                                                                                                                                                                                                                                                                                                                                                                                                                                                                                                                                                                                                                                                                                                                                                                                                                                                                                                                                                                                                                                                                                                                                                                                                                                                                                                                                                                                                                                                                                              |

|    |                                                                                                                                                                                                                                        |
|----|----------------------------------------------------------------------------------------------------------------------------------------------------------------------------------------------------------------------------------------|
| 3  | ((attenti* or disrupt*) near/3 (adolescent* or adult* or behav* or child* or class or classes or classroom* or condition* or difficult* or disorder* or learn* or people or person* or poor or problem* or process* or youngster*)):ti |
| 4  | ((attenti* or disrupt*) near/3 disorder*):ab                                                                                                                                                                                           |
| 5  | (adhd or addh or ad hd or ad??hd):ti,ab                                                                                                                                                                                                |
| 6  | (attenti* near/3 deficit*):ti,ab                                                                                                                                                                                                       |
| 7  | 1 or 2 or 3 or 4 or 5 or 6                                                                                                                                                                                                             |
| 8  | MeSH descriptor: [Child] this term only                                                                                                                                                                                                |
| 9  | MeSH descriptor: [Adolescent Health Services] this term only                                                                                                                                                                           |
| 10 | MeSH descriptor: [Adolescent] this term only                                                                                                                                                                                           |
| 11 | MeSH descriptor: [Young Adult] this term only                                                                                                                                                                                          |
| 12 | (child* or adolescent* or teenager* or young person or young people):ti,ab                                                                                                                                                             |
| 13 | 8 or 9 or 10 or 11 or 12                                                                                                                                                                                                               |
| 14 | MeSH descriptor: [Mobile Applications] explode all trees                                                                                                                                                                               |
| 15 | MeSH descriptor: [Internet] explode all trees                                                                                                                                                                                          |
| 16 | MeSH descriptor: [Therapy, Computer-Assisted] explode all trees                                                                                                                                                                        |
| 17 | (app or apps):ti,ab                                                                                                                                                                                                                    |
| 18 | (online or web or internet or digital*):ti                                                                                                                                                                                             |
| 19 | ((online or web or internet or digital*) near/3 (based or application* or intervention* or program* or therap*)):ab                                                                                                                    |
| 20 | (phone* or telephone* or smartphone* or cellphone* or smartwatch*):ti                                                                                                                                                                  |
| 21 | ((phone* or telephone* or smartphone* or cellphone* or smartwatch*) near/3 (based or application* or intervention* or program* or therap*)):ab                                                                                         |
| 22 | (mobile health or mhealth or m-health or ehealth or e-health or emental or e-mental):ti                                                                                                                                                |
| 23 | ((mobile health or mhealth or m-health or ehealth or e-health or emental or e-mental) near/3 (based or application* or intervention* or program* or therap*)):ab                                                                       |
| 24 | (mobile* near/3 (based or application* or intervention* or device* or technolog*)):ti,ab                                                                                                                                               |
| 25 | ((digital or online or internet or web*) near/4 (information or resource* or source* or toolkit* or tool-kit* or interactive*)):ab                                                                                                     |
| 26 | ((video* or multimedia or audiovisual* or youtube) near/4 (information or resource* or story or stories)):ti,ab                                                                                                                        |
| 27 | MeSH descriptor: [Consumer Health Information] explode all trees                                                                                                                                                                       |
| 28 | MeSH descriptor: [Audiovisual Aids] explode all trees                                                                                                                                                                                  |
| 29 | MeSH descriptor: [Social Media] explode all trees                                                                                                                                                                                      |
| 30 | MeSH descriptor: [Internet] explode all trees                                                                                                                                                                                          |
| 31 | 14 or 15 or 16 or 17 or 18 or 19 or 20 or 21 or 22 or 23 or 24 or 25 or 26 or 27 or 28 or 29 or 30                                                                                                                                     |
| 32 | 7 and 13 and 31                                                                                                                                                                                                                        |

B: Scoping review inclusion and exclusion criteria

| Inclusion                                                                                            | Exclusion                                    |
|------------------------------------------------------------------------------------------------------|----------------------------------------------|
| Measures effectiveness of intervention on sample with ADHD or sample who experience symptoms of ADHD | Neuro-feedback or bio-feedback interventions |

|                                                              |                                                                                                                                |
|--------------------------------------------------------------|--------------------------------------------------------------------------------------------------------------------------------|
| Sample includes participants aged 16-25 years old            | Parent or parent-child/family interventions                                                                                    |
| Intervention is delivered online or using digital technology | Intervention is delivered by a practitioner, teacher, or parent                                                                |
| Intervention is self-administered                            | Diagnostic/assessment tools                                                                                                    |
| Any country or healthcare setting                            | Secondary data analysis                                                                                                        |
| Research uses primary data                                   | Not published in peer-reviewed journal                                                                                         |
| Published in peer reviewed journal                           | Not available in English language                                                                                              |
| English language only                                        | Does not contain description of the intervention (or does not have associated protocol/paper with description of intervention) |
| Study contains description of intervention                   |                                                                                                                                |
| Can include pilot/feasibility trials                         |                                                                                                                                |

C: PRISMA flow diagram for scoping review

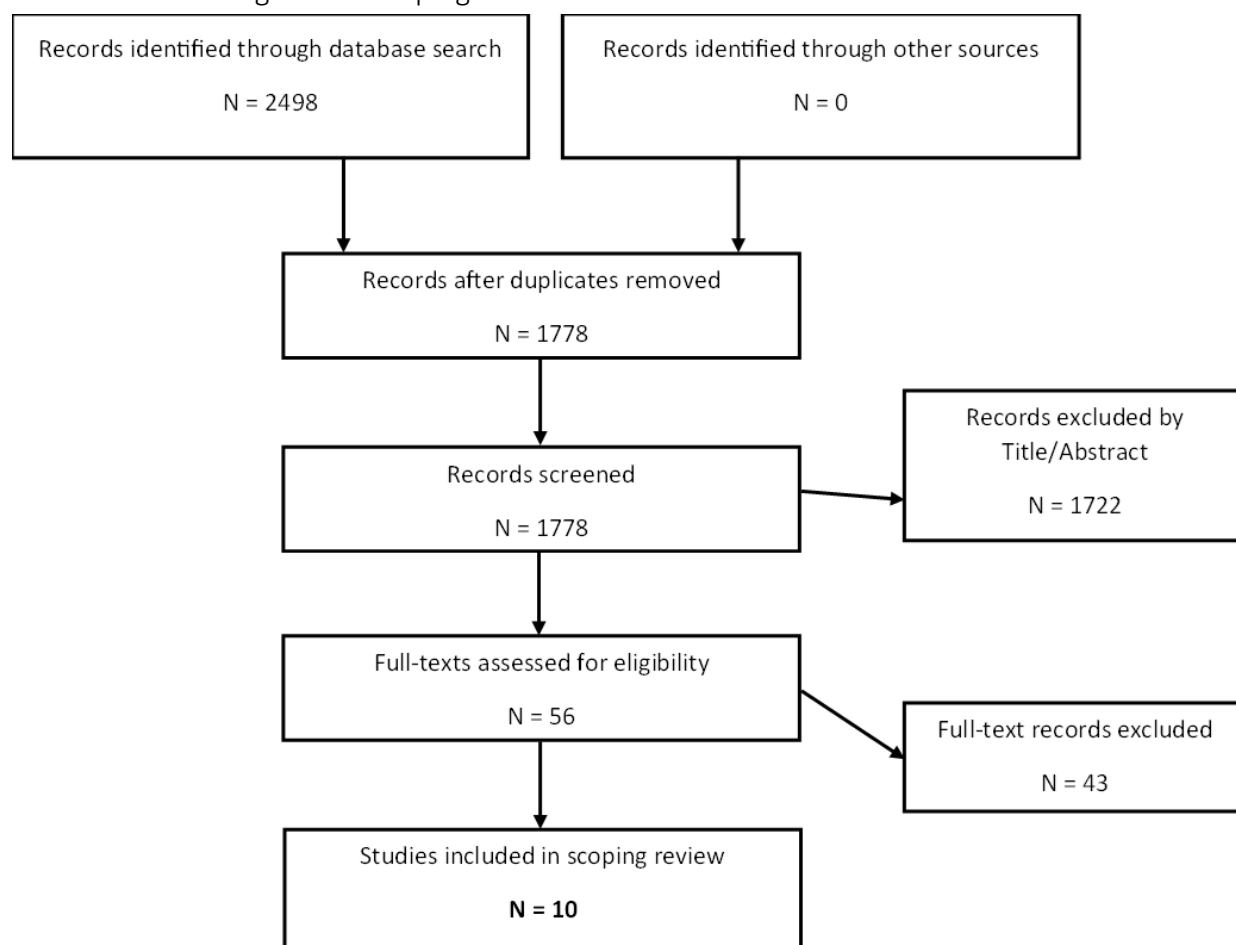

Supplement: Supplementary file 2 [file 75cab596820d5fa1891a5486.pdf]
