# Supplementary material for: Provision of digital health interventions for young people with ADHD in primary care: findings from a national survey and scoping review
Source: Research Square preprint supplement (doi:10.21203/rs.3.rs-3526525/v1), 2023-11-07
Supplement: Supplementary file 1 [file 2316ee03ec86e9a12ff6d183.pdf]

Additional file 2: Results from Healthcare practitioner questions

| <b>Question 5: Which resources do staff at your GP practice signpost or signpost or share with patients?*</b>                                                                                                                                                                                                                                                                                                                                                                                                           |                                      |      |        |       |              |         |
|-------------------------------------------------------------------------------------------------------------------------------------------------------------------------------------------------------------------------------------------------------------------------------------------------------------------------------------------------------------------------------------------------------------------------------------------------------------------------------------------------------------------------|--------------------------------------|------|--------|-------|--------------|---------|
| Information resource type                                                                                                                                                                                                                                                                                                                                                                                                                                                                                               | Current signposting reported         |      | 95% CI |       | McNemar test |         |
|                                                                                                                                                                                                                                                                                                                                                                                                                                                                                                                         | n                                    | %    | Lower  | Upper | % difference | p-value |
| Websites                                                                                                                                                                                                                                                                                                                                                                                                                                                                                                                | 138                                  | 76.2 | 69.4   | 82.2  | 54.7         | 0.0000  |
| Support groups                                                                                                                                                                                                                                                                                                                                                                                                                                                                                                          | 51                                   | 28.2 | 21.8   | 35.3  | 6.6          | 0.0833  |
| Printed materials                                                                                                                                                                                                                                                                                                                                                                                                                                                                                                       | 39                                   | 21.5 | 15.8   | 28.3  | -            | -       |
| Do not know                                                                                                                                                                                                                                                                                                                                                                                                                                                                                                             | 33                                   | 18.2 | 12.9   | 24.6  | -3.3         | 0.4795  |
| Online training                                                                                                                                                                                                                                                                                                                                                                                                                                                                                                         | 22                                   | 12.2 | 7.8    | 17.8  | -9.4         | 0.0065  |
| Video clip                                                                                                                                                                                                                                                                                                                                                                                                                                                                                                              | 18                                   | 9.9  | 6.0    | 15.3  | -11.6        | 0.0010  |
| Audio clip/podcast                                                                                                                                                                                                                                                                                                                                                                                                                                                                                                      | 17                                   | 9.4  | 5.6    | 14.6  | -12.2        | 0.0004  |
| Digital app                                                                                                                                                                                                                                                                                                                                                                                                                                                                                                             | 16                                   | 8.8  | 5.1    | 14.0  | -12.7        | 0.0002  |
| <b>Question 6: Which resources would it be useful for staff at your GP practice signpost or signpost or share with patients?***</b>                                                                                                                                                                                                                                                                                                                                                                                     |                                      |      |        |       |              |         |
| Information resource type                                                                                                                                                                                                                                                                                                                                                                                                                                                                                               | Signposting would be useful reported |      | 95% CI |       | McNemar test |         |
|                                                                                                                                                                                                                                                                                                                                                                                                                                                                                                                         | n                                    | %    | Lower  | Upper | % difference | p-value |
| Digital App                                                                                                                                                                                                                                                                                                                                                                                                                                                                                                             | 138                                  | 77.1 | 70.2   | 83.0  | 20.1         | 0.0000  |
| Support group                                                                                                                                                                                                                                                                                                                                                                                                                                                                                                           | 128                                  | 71.5 | 64.3   | 78.0  | 14.5         | 0.0006  |
| Online training                                                                                                                                                                                                                                                                                                                                                                                                                                                                                                         | 108                                  | 60.3 | 52.8   | 67.6  | 3.4          | 0.4533  |
| Audio clip/Podcast                                                                                                                                                                                                                                                                                                                                                                                                                                                                                                      | 107                                  | 59.8 | 52.2   | 67.0  | 2.8          | 0.5078  |
| Video clip                                                                                                                                                                                                                                                                                                                                                                                                                                                                                                              | 104                                  | 58.1 | 50.5   | 65.4  | 1.1          | 0.8055  |
| Printed material                                                                                                                                                                                                                                                                                                                                                                                                                                                                                                        | 102                                  | 57.0 | 49.4   | 64.3  | -            | -       |
| Website                                                                                                                                                                                                                                                                                                                                                                                                                                                                                                                 | 89                                   | 49.7 | 42.2   | 57.3  | -7.3         | 0.0960  |
| Do not know                                                                                                                                                                                                                                                                                                                                                                                                                                                                                                             | 17                                   | 9.5  | 5.6    | 14.8  | -47.5        | 0.0000  |
| <p><i>95% confidence interval for proportion (95% CI) calculated using the proportion of respondents of respondents indicating "yes" to each resource type, % difference between number of responses to each resource type and printed material and p-value calculated using McNemar's test for significance, with printed material as the reference category.</i></p> <p><i>*Total number of unique respondents to question 5, n=181</i></p> <p><i>**Total number of unique respondents to question 6, n = 179</i></p> |                                      |      |        |       |              |         |
